# Supplementary material for: Experiences managing pregnant hospital staff members using an active management policy—A qualitative study
Source: PubMed Central journal article supplement (PMC7909656; doi:10.1371/journal.pone.0247547), 2021-02-26
Supplement: pone.0247547.s001.pdf [file pone.0247547.s001.pdf]

## Interviewguide Danish version (fokusgruppeinterview Aktiv Gravidpolitik)

### Formål

At undersøge hvilke overvejelser og erfaringer ledere gør sig i ledelsen af gravide medarbejdere, samt beskrive deres erfaringer med anvendelse af en Aktiv Gravidpolitik (AGp)

Inden interviewet udfyldes kort spørgeskema, samt samtykkeerklæring

|                |                                                                                                                                                                                                                                                                                                                                                                                                                                                                                                                                                                                                                                                                                                          |
|----------------|----------------------------------------------------------------------------------------------------------------------------------------------------------------------------------------------------------------------------------------------------------------------------------------------------------------------------------------------------------------------------------------------------------------------------------------------------------------------------------------------------------------------------------------------------------------------------------------------------------------------------------------------------------------------------------------------------------|
| Indledning     | <p><b>Velkommen (formål)</b>, I er inviteret fordi I er ledere og fordi I har deltaget i AGp.... Vi præsenterer os som jordemødre med uddannelse i forskning.</p> <p><b>Sikre anonymitet</b> : Det er vigtigt at understrege at I er sikret anonymitet, det betyder at data ikke bliver tilgængelig for andre end forskningsgruppen og at jeres identitet og arbejdssted ikke bliver offentliggjort.</p> <p><b>Præsentationsrunde</b> + navneskilte</p> <p><b>Fokusgruppeinterviewets form</b> tale/diskutere med hinanden</p> <p><b>Præsentation af moderator og sekretær</b> 'Vi er her for at lære af jer' (oplevelser og holdninger) der findes ingen rigtige svar (B Halkier kap 3, s. 58)</p>      |
| Spørgeområde 1 | <p><b>Den generelle oplevelse af at være leder for gravide medarbejdere</b></p> <p><u>Åbningsspørgsmål</u>: "fortæl lidt om de erfaringer I har gjort - med gravide medarbejdere i jeres tid som leder"</p> <p>"Gør man sig som leder særlige overvejelser i ledelsen af gravide medarbejdere?"</p> <p>"Hvad oplever I, som særligt vigtigt i samarbejdet med en gravid medarbejder (hvornår lykkes det)?"</p> <p>"Er der tilstrækkelige muligheder for at tage hensyn til eller give en gravid medarbejder andre opgaver?"</p> <p>(Det undrer mig at ingen af jer har nævnt...)hjælpesætning Mange ledere har talt om holdningen/tilgangen hos de gravide (at nogle VIL sygemeldes lige meget hvad)</p> |

|               |                                                                                                                                                                                                                                                                                                                                                                                                                                                                    |
|---------------|--------------------------------------------------------------------------------------------------------------------------------------------------------------------------------------------------------------------------------------------------------------------------------------------------------------------------------------------------------------------------------------------------------------------------------------------------------------------|
| Spøgeområde 2 | <p><b>AGp's anvendelse i praksis og vurdering af udbytte.</b></p> <p>”Oplevede I det som relevant at blive inviteret på seminar i AGp?</p> <p>Har det ændret jeres tilgang til gravide medarbejdere i praksis?</p> <p>”Hvilke udfordringer har I oplevet ved at skulle omsætte AGp til den kliniske dagligdag?” er der nogen?</p> <p>”Hvordan vil I vurdere udbyttet (hvad har det betydet) at have deltaget i projektet og dermed også seminaret” uddyb gerne</p> |
| Spøgeområde 3 | <p><b>Forbedringstiltag</b></p> <p>”Hvad skal der til hvis opgaven med at forbedre trivslen for gravide medarbejdere og derved nedbringe sygefraværet, skal gøres lettere/bedre? (organisatorisk, lovgivning mm)”</p> <p>Der har været tale om tre-parts samtaler (gravid, leder, fagperson) som en mulighed. Hvad er jeres tanker om det</p>                                                                                                                      |
| Afslutning    | <p>Når I sådan lige tænker tilbage på hvad vi har talt om, er der så noget I har lyst til at tilføje, eller måske temaer vi ikke har været inde omkring?</p>                                                                                                                                                                                                                                                                                                       |
