# Supplementary material for: Experiences managing pregnant hospital staff members using an active management policy—A qualitative study
Source: PubMed Central journal article supplement (PMC7909656; doi:10.1371/journal.pone.0247547), 2021-02-26

# Content of the INTERVENTION

All managers, at the workunits allocated to intervention, were invited to participate in a ***three-hour seminar\****

## **The three-hour seminars**

The seminars were held at the workplaces and tutors were an occupational physician and a former hospital manager, who used an active pregnancy policy as a manager at an emergency department

*Content of the seminar was:*

- Knowledge about occupational risk factors in relation to pregnancy
- Introduction to the *Active Pregnancy policy concept (APp-concept)*
- Case-based work with the concept

*Each manager received:*

- A printed booklet about the *APp-concept*
- A printed booklet about occupational risk factors in relation to pregnancy
- A poster with the study name to display at their work units.

Managers in the intervention were given access to a Hotline, if they had questions about occupational factors in relation to pregnant employees and they were given username and password to [www.aktivgravidpolitik.com](http://www.aktivgravidpolitik.com), that held all seminar presentations, printed materials and detailed study information

## **The APp-concept**

A positive, solution-oriented proactive approach, which consists of:

1. *A visible and acknowledged policy of pregnancy* at the work unit
2. *A congratulation letter* from the manager to the pregnant employee inviting her to the first meeting
3. *Planned meetings* during the pregnancy between the manager and the employee with an individual risk assessment and talk about worries and needs for job adjustments
4. *Job adjustments* when needed (fx changes in work schedules, different work tasks, extra small breaks)

\* At two hospitals participation was mandatory, whereas participation was voluntary in the other three hospitals

# The Active management policy

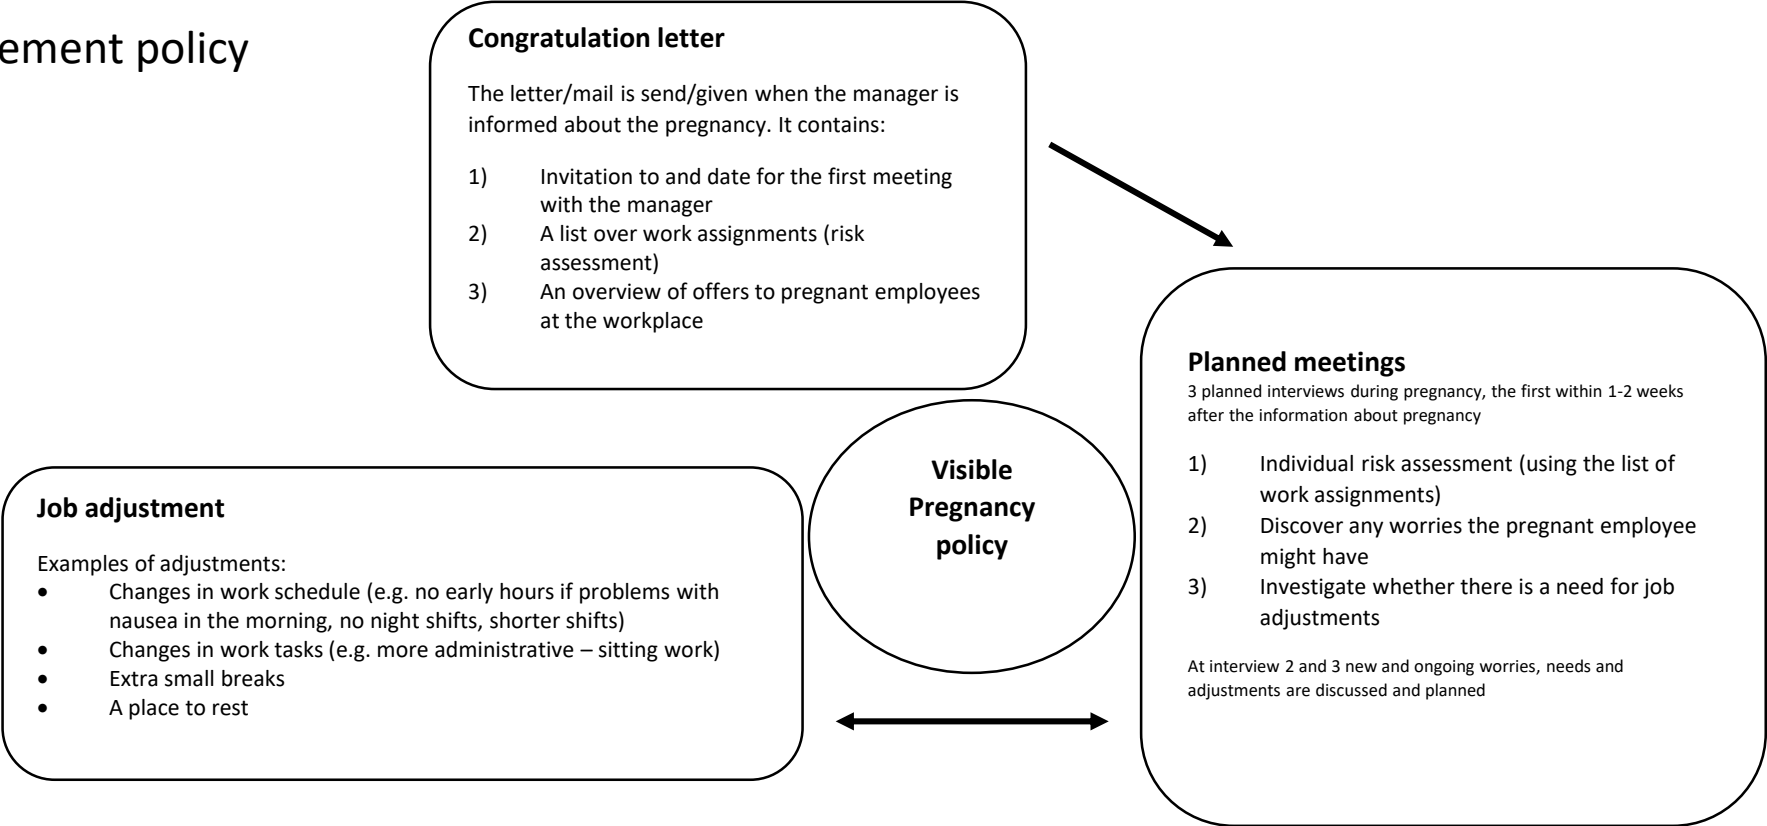

Supplement: pone.0247547.s003.pdf [file pone.0247547.s003.pdf]
